# Supplementary material
Source: publisher site journal article supplement (https://www.spandidos-publications.com/3555/downloadSupplementary)

Figure S1. Optimization of plasmid incubation duration. Plasmid transfection efficiency in HepG2 cells was analyzed at both 24 and 48 h post-transfection and compared based on the percentage of green fluorescent (pEGFP-N1<sup>+</sup>) cells. Incubating the cells for 48 h resulted in higher transfection efficiency (60%) compared with that observed after 24 h incubation (45%). Images were obtained using a fluorescence microscope at x100 magnification.

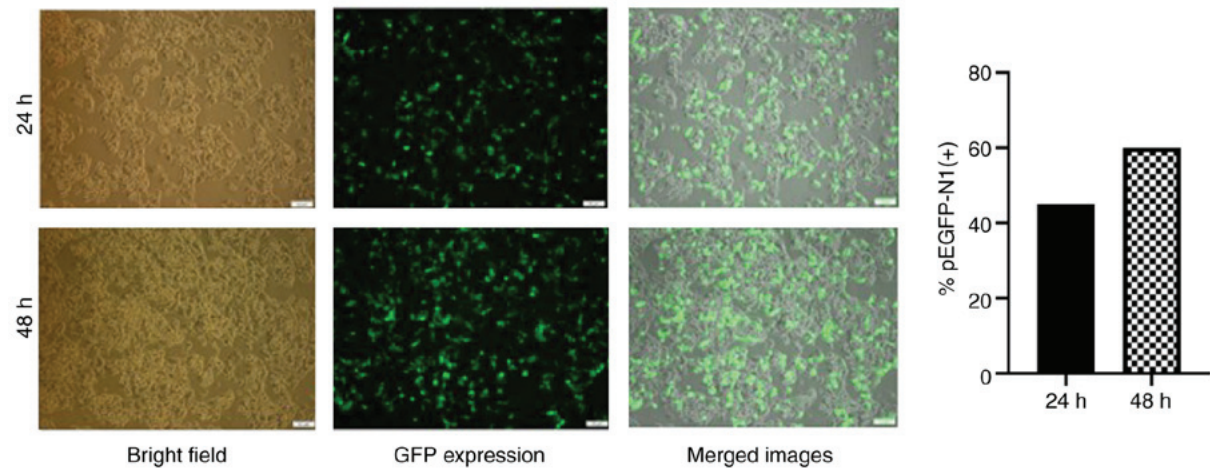

Supplement: Supplementary file 1 [file downloadSupplementary]
